# Supplementary material for: NgAgo-based fabp11a gene knockdown causes eye developmental defects in zebrafish
Source: PubMed Central journal article supplement (PMC5143420; doi:10.1038/cr.2016.134), 2016-11-11
Supplement: cr2016134x2.pdf [file cr2016134x2.pdf]

**Supplementary information, Table S1A**

| <b>The sequences were used for <i>fabp11a</i></b> |                                   |
|---------------------------------------------------|-----------------------------------|
| Morpholino                                        | 5'-ACCATTTTCCCGAATAATGATGCTC-3'   |
| Control morpholino                                | 5'-CCTCTTACCTCAGTTACAATTTATA-3'   |
| gRNA 1                                            | 5'-GTGCAGAAACAGACCTGGGA-3'        |
| gRNA 2                                            | 5'-GGAGTCCACAATAGAGAGAG-3'        |
| RV-guide DNA 1                                    | 5'-AGCCGTTTCGAGGAGACCACGGCGG-3'   |
| FW-guide DNA 1                                    | 5'-CCGTGGTCTCCTCGAACGGCTCGT-3'    |
| RV-guide DNA 2                                    | 5'-TGTGCAGAAACAGACCTGGGACGG-3'    |
| FW-guide DNA 2                                    | 5'-TCCCAGGTCTGTTTCTGCACAAGT-3'    |
| FW-guide DNA 2-mismatch1                          | 5'-TCAAAGGTCTGTTAATTCACAAGT-3'    |
| FW-guide DNA 2-mismatch2                          | 5'-TCTTAGGTCTGTAAATGCACAAGT-3'    |
| FW-guide DNA 2-20bp                               | 5'-AGGTCTGTTTCTGCACAAGT-3'        |
| FW-guide DNA 2-21bp                               | 5'-CAGGTCTGTTTCTGCACAAGT-3'       |
| FW-guide DNA 2-22bp                               | 5'-CCAGGTCTGTTTCTGCACAAGT-3'      |
| FW-guide DNA 2-23bp                               | 5'-CCCAGGTCTGTTTCTGCACAAGT-3'     |
| FW-guide DNA 2-25bp                               | 5'-GTCCCAGGTCTGTTTCTGCACAAGT-3'   |
| FW-guide DNA 2-26bp                               | 5'-CGTCCCAGGTCTGTTTCTGCACAAGT-3'  |
| FW-guide DNA 2-27bp                               | 5'-CCGTCCCAGGTCTGTTTCTGCACAAGT-3' |
| FW-guide DNA 3                                    | 5'-GTGTGGGTTTTGCTACTCGTCAGG-3'    |
| FW-guide DNA 4                                    | 5'-CAAACCCAATCTAGTGGTGTGTGT-3'    |

| <b>The sequences were used for <i>ntl(ta)</i></b> |                                   |
|---------------------------------------------------|-----------------------------------|
| RV-guide DNA 1                                    | 5'-CTCGACCCTAATGCAATGTACTCG-3'    |
| FW-guide DNA 1                                    | 5'-CGAGTACATTGCATTAGGGTCGAG-3'    |
| FW-guide DNA 1 mismatch1                          | 5'-CGAGTACATAACATTAATTTTCGAG-3'   |
| FW-guide DNA 1 mismatch2                          | 5'-CGAGTATGTTGCATTATAATCGAG-3'    |
| FW-guide DNA 1-20bp                               | 5'-TACATTGCATTAGGGTCGAG-3'        |
| FW-guide DNA 1-21bp                               | 5'-GTACATTGCATTAGGGTCGAG-3'       |
| FW-guide DNA 1-22bp                               | 5'-AGTACATTGCATTAGGGTCGAG-3'      |
| FW-guide DNA 1-23bp                               | 5'-GAGTACATTGCATTAGGGTCGAG-3'     |
| FW-guide DNA 1-25bp                               | 5'-CCGAGTACATTGCATTAGGGTCGAG-3'   |
| FW-guide DNA 1-26bp                               | 5'-ACCGAGTACATTGCATTAGGGTCGAG-3'  |
| FW-guide DNA 1-27bp                               | 5'-GACCGAGTACATTGCATTAGGGTCGAG-3' |
| <b>The sequences were used for <i>kdrl</i></b>    |                                   |
| FW-guide DNA 1                                    | 5 '-ACCAAAGCAGACCCCTCAAACCAG-3'   |
| <b>The sequences were used for <i>flt1</i></b>    |                                   |
| FW-guide DNA 1                                    | 5 '- CACACGGGCTCCTACCGCTGCAGG-3'  |
| Morpholino                                        | 5 '- ATATCGAACATTCTCTTGGTCTTGC-3' |
| Control morpholino                                | 5'-CCTCTTACCTCAGTTACAATTTATA-3'   |
| <b>The sequences were used for <i>lamal</i></b>   |                                   |
| FW-guide DNA 1                                    | 5 '- CATCATCATTAAAGCAGCAAACCTC-3' |

Supplementary information, Table S1B

| <b>Primers for <i>fabp11a</i></b>  |                                |                              |
|------------------------------------|--------------------------------|------------------------------|
|                                    | Left primer                    | Right primer                 |
| RT-PCR and probe                   | 5'-TGCTACTCGTCAGGTTGGAA-3'     | 5'-ACTGAGCCTGGCATCTTCAA-3'   |
| Real Time PCR                      | 5'-ACGGCGGATGACAGAAAGA-3'      | 5'-CACCACATCACCCATCTTGC-3'   |
| Mutation Screen                    | 5'-TGACCACCAGCGACAAC-3'        | 5'-ATACAGCCTGCTATTTAA-3'     |
| Sequencing primer                  | 5'-AACTATGGGTATGTGGAC-3'       |                              |
| <b>Primers for <i>ta (ntl)</i></b> |                                |                              |
| Real Time                          | 5'-ATCCCAGCCATTACTCCCAC-3'     | 5'-GGTAGTGTTTGTGGTGTGGG-3'   |
| Mutation Screen                    | 5'-TCACCAAGACTGGGAGG-3'        | 5'-CCACCGACTTTCACGAT-3'      |
| Sequencing primer1                 | 5'-GCCGAAGTTGGGTGAGTCCG-3'     |                              |
| Sequencing primer2                 | 5'-CTGTCCTCCTCCGTTGAGTT-3'     |                              |
| <b>Primers for <i>kdrl</i></b>     |                                |                              |
| Real Time PCR                      | 5'-ATCCCAGCCATTACTCCCAC-3'     | 5'-TGCCTCAAGTTGTGTATGACT -3' |
| Mutation Screen                    | 5'-CAACACAACATCCAAACAAAACA -3' | 5'-AGGGGCCCTTAATGCTACG-3'    |

|                                 |                                  |                             |
|---------------------------------|----------------------------------|-----------------------------|
| Sequencing1                     | 5 ‘ - TCCATAATAACACCATATCC-3’    |                             |
| Sequencing2                     | 5 ‘ - GCTTGAATGAATAATGATCG-3’    |                             |
| <b>Primers for <i>flt1</i></b>  |                                  |                             |
| Real Time PCR                   | 5’-TACATGAAGGAGGGAGAGCC-3’       | 5’-ATGAATCCCTGCCTGCTGTT -3’ |
| Mutation Screen                 | 5’-ACCCTCAAGCAAGACCAAGA -3’      | 5’-CTGATGGACACCCTGGAGTT-3’  |
| Sequencing1                     | 5 ‘ - GGGACGGTGGGAGCTCCAGT -3’   |                             |
| Sequencing2                     | 5 ‘ - AACTCTACCCCGACACACAT -3’   |                             |
| <b>Primers for <i>lama1</i></b> |                                  |                             |
| Real Time PCR                   | 5’- AGTACTGCTGCCTGATGACC -3’     | 5’-GAACTGGTGGGATTCTGGGA-3’  |
| Mutation Screen                 | 5’- TGCAAATAGTTCTGACTTGA-3’      | 5’-ATCGCTAATGGCGTAAA-3’     |
| Sequencing                      | 5 ‘ - CTGACTTGAAGTGTAAATACAT -3’ |                             |
